# Supplementary material for: Human polyomaviruses and incidence of cutaneous squamous cell carcinoma in the New Hampshire skin cancer study
Source: PubMed Central journal article supplement (PMC4924382; doi:10.1002/cam4.674), 2016-02-21
Supplement: CAM4-5-1239-s004.pdf [file CAM4-5-1239-s004.pdf]

**BK**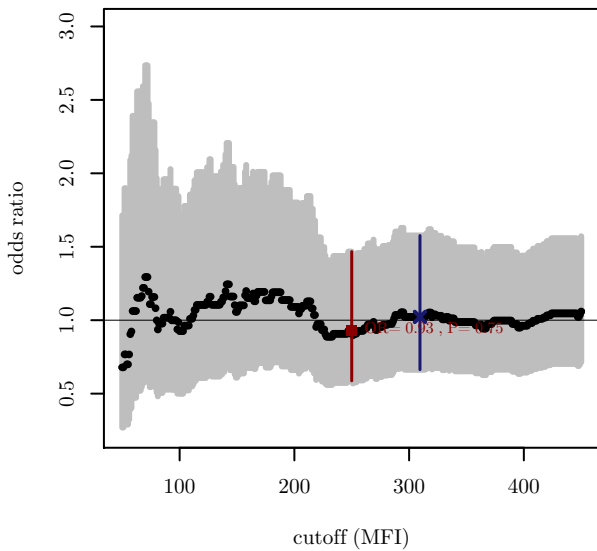**JC**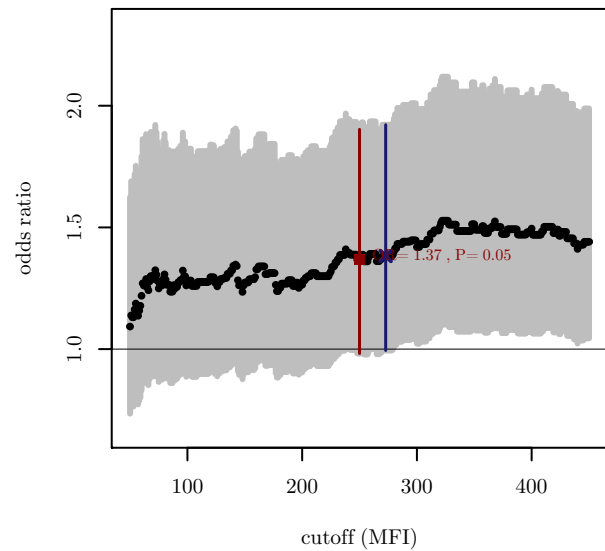**KI**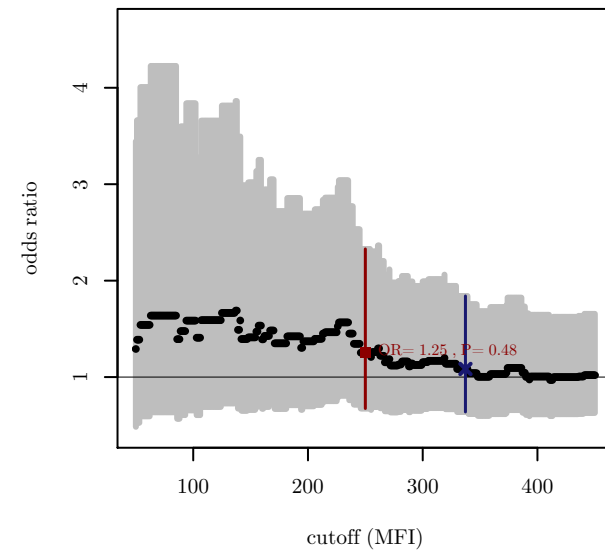**WU**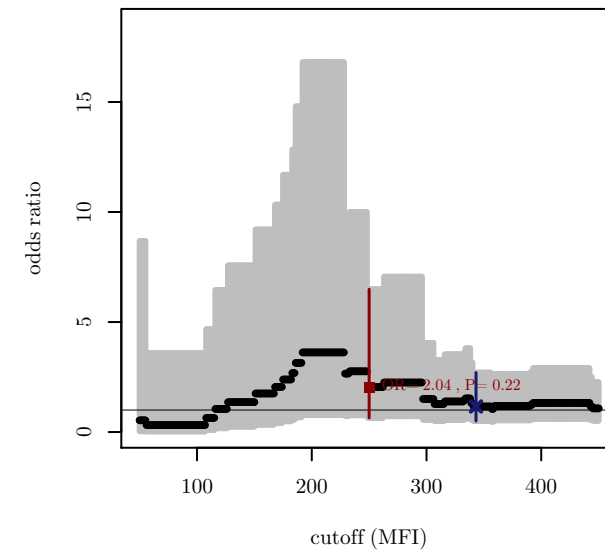**MCV**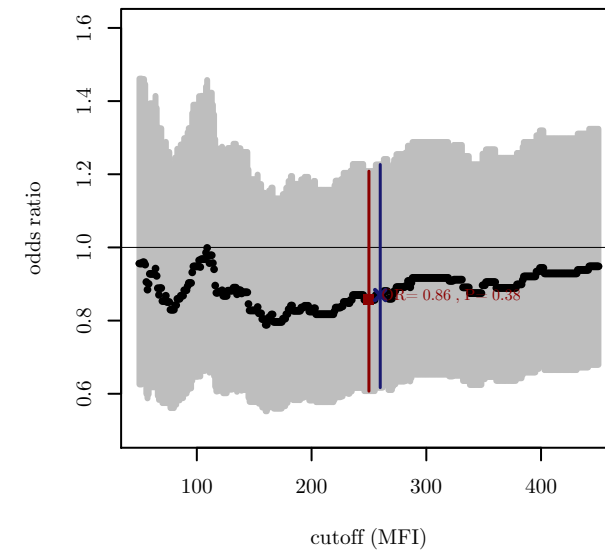**HPyV6**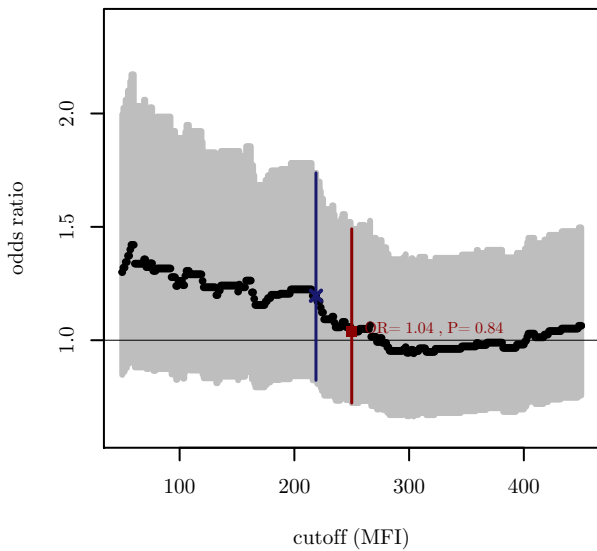**HPyV7**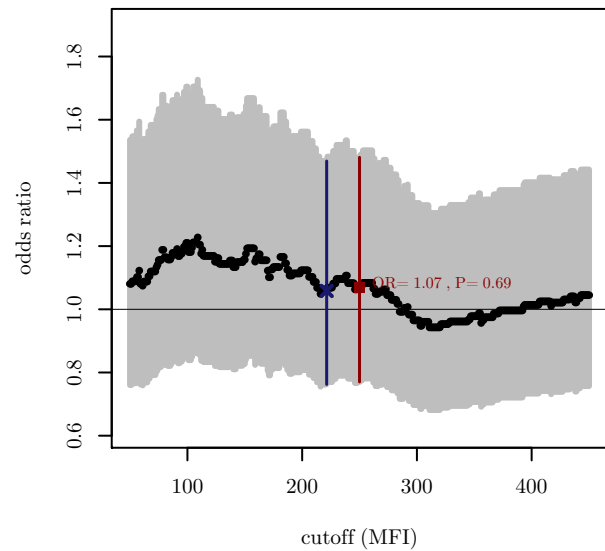**TSV**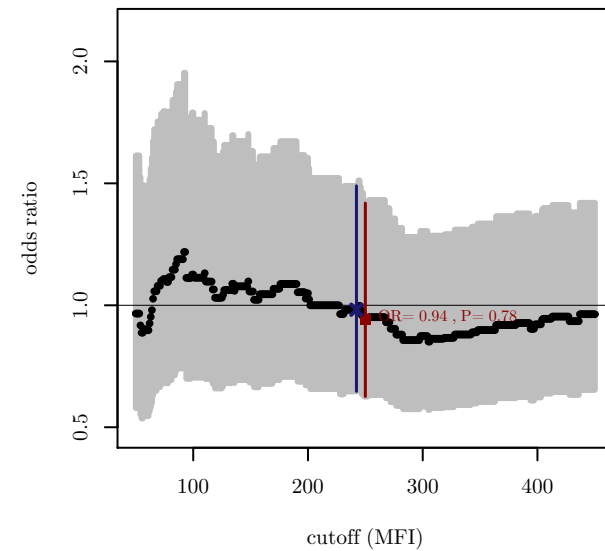**HPyV9**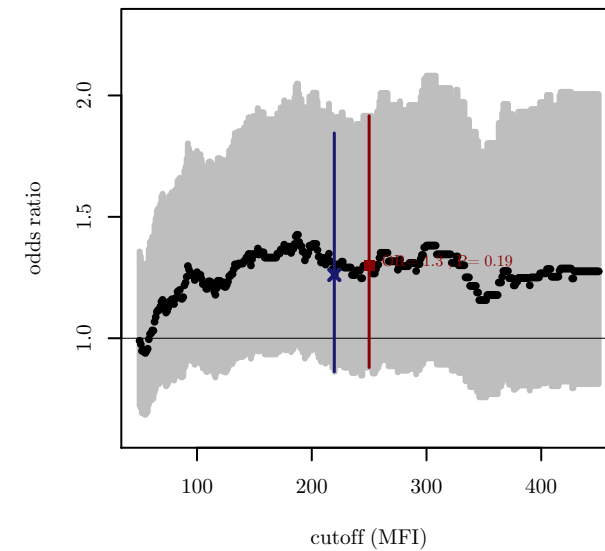

Supplemental  
Figure 2
